# Supplementary material for: Recurrent Structural Motifs in Non-Homologous Protein Structures
Source: Int J Mol Sci. 2013 Apr 10;14(4):7795–814. doi: 10.3390/ijms14047795 (PMC3645717; doi:10.3390/ijms14047795)
Supplement: Supplementary file 1 [file ijms-14-07795-s001.pdf]

## Supplementary Information

**Table S1.** Amino acid compositions in percent as seen over all residues in all chains (column 2), all candidate structural motifs (column 3), and all RSMs (column 4). Column 5 presents the amino acid composition when summed over all RSMs, counting each residue as many times as it is present in RSMs.

| Amino acid | Protein chain | Candidate structural motif | RSM  | RSM <sub>Σ</sub> |
|------------|---------------|----------------------------|------|------------------|
| V          | 7.0           | 7.2                        | 14.4 | 25.5             |
| I          | 5.8           | 6.0                        | 10.8 | 15.3             |
| L          | 9.6           | 9.8                        | 14.4 | 17.5             |
| P          | 4.5           | 4.4                        | 1.7  | 0.8              |
| Y          | 3.6           | 3.8                        | 4.4  | 2.9              |
| A          | 7.9           | 7.8                        | 8.4  | 6.7              |
| W          | 1.4           | 1.5                        | 1.0  | 0.3              |
| M          | 1.7           | 1.7                        | 1.0  | 0.3              |
| H          | 2.3           | 2.3                        | 1.4  | 0.6              |
| K          | 5.9           | 5.9                        | 4.5  | 3.2              |
| R          | 5.1           | 5.2                        | 4.4  | 3.0              |
| D          | 5.9           | 5.8                        | 3.1  | 2.0              |
| E          | 6.9           | 6.8                        | 4.9  | 3.6              |
| S          | 6.1           | 5.9                        | 4.5  | 3.0              |
| T          | 5.5           | 5.5                        | 6.2  | 6.3              |
| N          | 4.4           | 4.3                        | 1.8  | 0.7              |
| Q          | 3.9           | 3.9                        | 2.2  | 0.9              |
| C          | 1.3           | 1.3                        | 1.0  | 0.4              |
| G          | 6.8           | 6.5                        | 4.6  | 2.9              |
| P          | 4.5           | 4.4                        | 1.7  | 0.8              |
